# Supplementary material for: The emergence of the visual word form: Longitudinal evolution of category-specific ventral visual areas during reading acquisition
Source: PLoS Biol. 2018 Mar 6;16(3):e2004103. doi: 10.1371/journal.pbio.2004103 (PMC5856411; doi:10.1371/journal.pbio.2004103)
Supplement: S4 Data — (XLSX) [file pbio.2004103.s013.xlsx]

## Sheet: Feuil1
	Mean									ET
Fig7A			'Words'	'Numbers'	'Tools'	'Bodies'	'Faces'	'Houses'		'Words'	'Numbers'	'Tools'	'Bodies'	'Faces'	'Houses'
		Between-Cat	0.3969	0.4341	0.4791	0.488	0.4549	0.4287		0.3969	0.4341	0.4791	0.488	0.4549	0.4287
		Within-Cat	0.4783	0.4863	0.6163	0.5867	0.5595	0.4987		0.0385	0.0372	0.0304	0.0395	0.0433	0.037
Fig7B		Sessions	'1/2'	'2/3'	'3/4'	'4/5'	'5/6'			'1/2'	'2/3'	'3/4'	'4/5'	'5/6'
	Images	Between-Cat	0.3934	0.4628	0.5	0.4892	0.461			0.0303	0.0293	0.0267	0.0204	0.0296
		Within-Cat	0.5031	0.5471	0.6121	0.6001	0.5738			0.043	0.0369	0.0335	0.0303	0.0406
	Words	Between-Cat	0.3026	0.3868	0.4773	0.4337	0.416			0.0539	0.0302	0.0274	0.0272	0.0381
		Within-Cat	0.3204	0.425	0.5643	0.5416	0.5301			0.0436	0.0259	0.0428	0.0299	0.0435
Fig7C			'Words'	'Numbers'	'Tools'	'Bodies'	'Faces'	'Houses'		'Words'	'Numbers'	'Tools'	'Bodies'	'Faces'	'Houses'
		Between-Cat	0.2987	0.3252	0.3773	0.3645	0.2687	0.2705		0.0583	0.0577	0.0521	0.0498	0.0599	0.0517
		Within-Cat	0.3984	0.4084	0.5541	0.4248	0.3141	0.281		0.0639	0.0717	0.0678	0.0559	0.0642	0.0701
Fig7D		Sessions	'1/2'	'2/3'	'3/4'	'4/5'	'5/6'			'1/2'	'2/3'	'3/4'	'4/5'	'5/6'
	Images	Between-Cat	0.273	0.3316	0.3634	0.3662	0.3311			0.0592	0.0533	0.052	0.0515	0.0512
		Within-Cat	0.3227	0.4142	0.4608	0.4491	0.4292			0.0668	0.0693	0.0625	0.0666	0.0566
	Words	Between-Cat	0.1988	0.2597	0.4223	0.3366	0.3288			0.0647	0.0706	0.0573	0.0383	0.054
		Within-Cat	0.309	0.3184	0.5274	0.5215	0.4609			0.0616	0.0898	0.0417	0.0542	0.0544
Fig7E			'Words'	'Numbers'	'Tools'	'Bodies'	'Faces'	'Houses'		'Words'	'Numbers'	'Tools'	'Bodies'	'Faces'	'Houses'
		Between-Cat	0.3062	0.2674	0.4605	0.4856	0.4814	0.4816		0.0453	0.0838	0.0239	0.0258	0.0383	0.0319
		Within-Cat	0.4118	0.301	0.569	0.5276	0.5854	0.5517		0.0552	0.0842	0.0233	0.036	0.0415	0.0403
Fig7F			'Words'	'Numbers'	'Tools'	'Bodies'	'Faces'	'Houses'		'Words'	'Numbers'	'Tools'	'Bodies'	'Faces'	'Houses'
		Between-Cat	0.2272	0.3594	0.4493	0.4995	0.5313	0.5162		0.05	0.0281	0.033	0.0253	0.0403	0.0329
		Within-Cat	0.2779	0.4096	0.5314	0.5349	0.542	0.5575		0.0538	0.0268	0.0353	0.0213	0.0422	0.0389
